# Supplementary material for: Control of crustal strength, tectonic inheritance and extrusion/indentation rates on crustal deformation and basin reactivation: insights from laboratory models
Source: Copernicus journal article supplement (doi:10.5194/egusphere-2022-62), 2022-03-25
Supplement: Supplementary file 1 [file egusphere-2022-62-supplement.pdf]

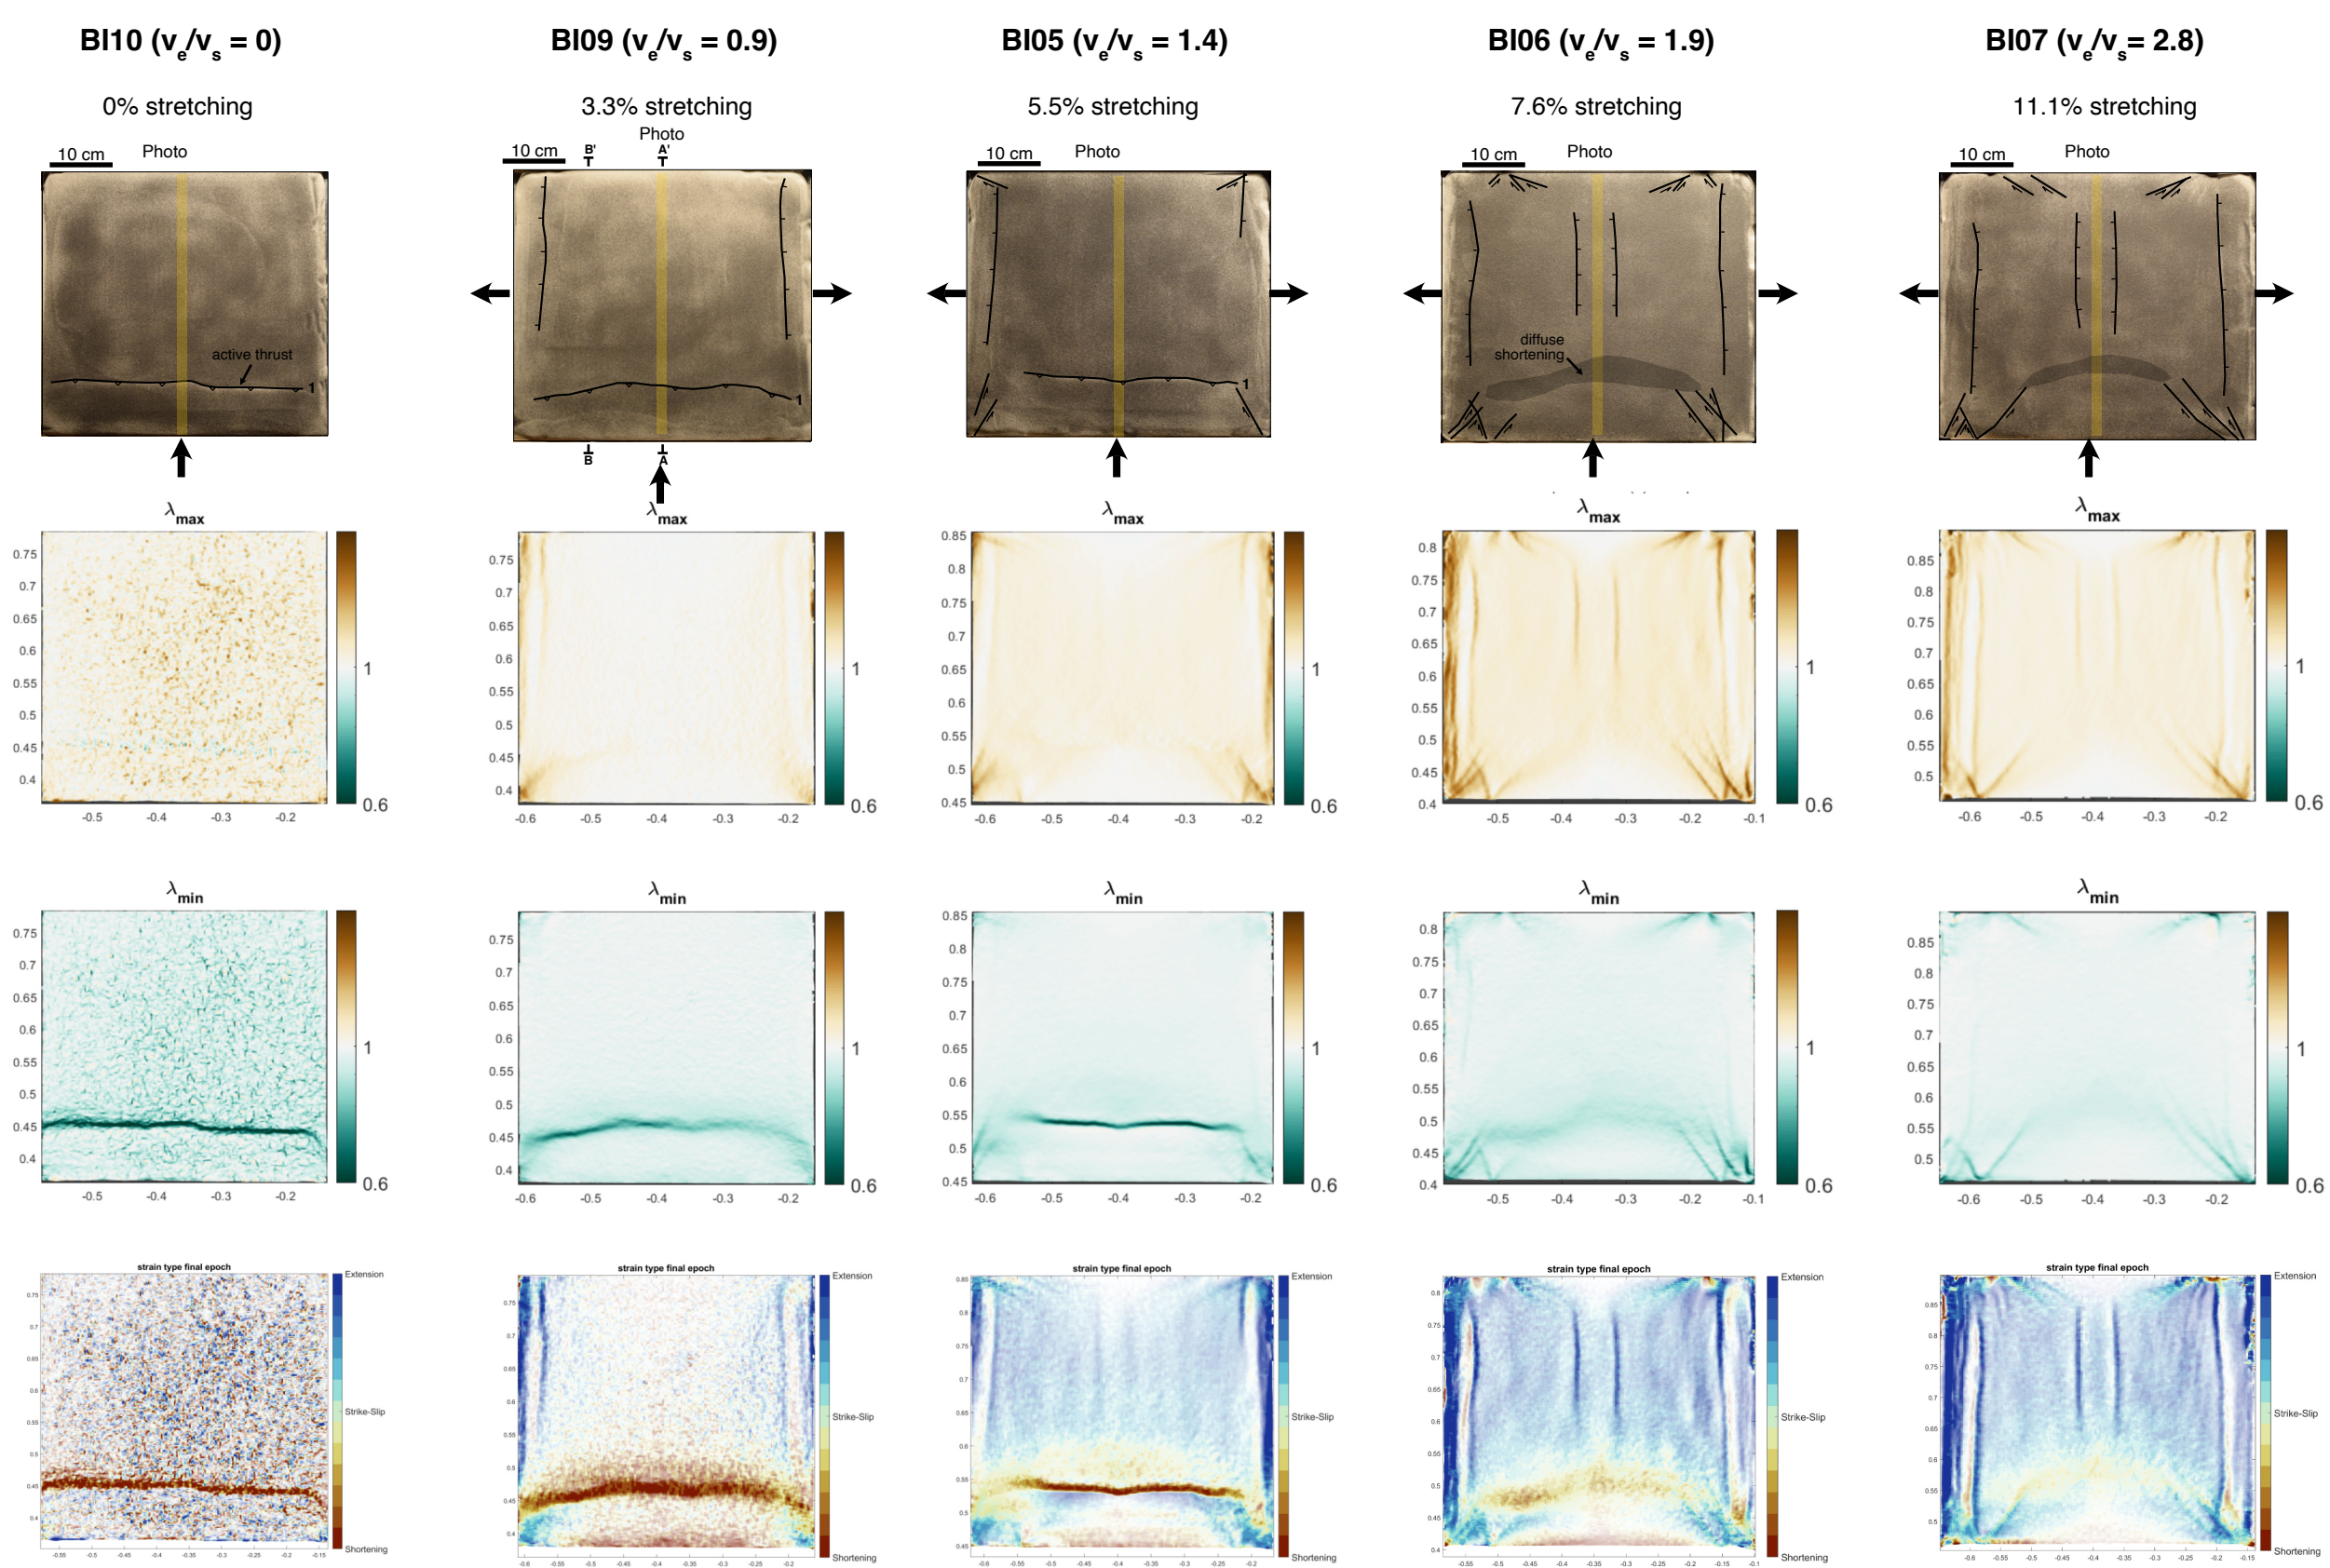

**Fig. SM1:** Interpreted pictures, principal stretches  $\lambda_{\max}$ ,  $\lambda_{\min}$  ( $\lambda = 1$  represents no length change) and strain type after 4% of along-y shortening for brittle models BI10, BI09, BI05, BI06, and BI07: shortening (red), strike-slip (green) and stretching (blue), with intermediate, oblique deformation at intermediate colors. The corresponding amount of along-x stretching is indicated at the top.
